# Supplementary material for: Ultra-sensitive and selective determination of a phenolic food additive using protein capped gold nanoclusters: a dual in-line fluorometric and colorimetric sensing probe
Source: Royal Society of Chemistry journal article supplement (doi:10.1039/d0nj04712k), 2020-12-21
Supplement: d0nj04712k1.pdf [file d0nj04712k1.pdf]

## **Supporting information**

### **Ultra-sensitive and selective determination of phenolic food additive using protein capped gold nanoclusters: A dual in-line fluorometric and colorimetric sensing probe**

Sekar Shankar,<sup>a</sup> N.S.K. Gowthaman,<sup>b</sup> P. Arul,<sup>c</sup> Feng Chen,<sup>a</sup> H.N. Lim,<sup>b</sup> Feng-Xiang Qin<sup>\*a</sup>

<sup>a</sup>School of Material Science and Engineering, Nanjing University of Science and Technology, Nanjing 210094, China

<sup>b</sup>Materials Synthesis and Characterization Laboratory, Institute of Advanced Technology University Putra Malaysia, 43400 UPM Serdang, Selangor, Malaysia

<sup>c</sup>Institute of Biochemical and Biomedical Engineering, Department of Chemical Engineering and Biotechnology, National Taipei University of Technology, Taipei, 106, Taiwan.

\*Corresponding author e-mail: [fengxiangqin@njust.edu.cn](mailto:fengxiangqin@njust.edu.cn) (F.X. Qin)

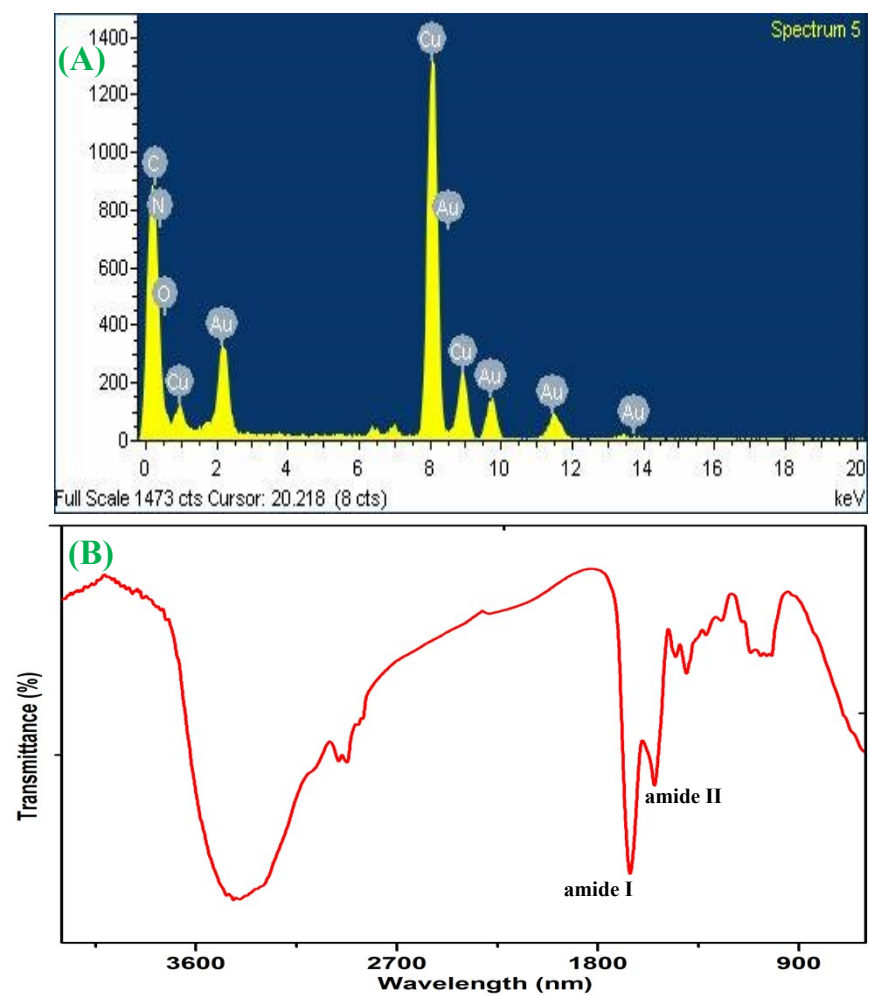

**Fig.S1.** EDS (A) and FT-IR (B) spectrum of BSA-AuNCs.

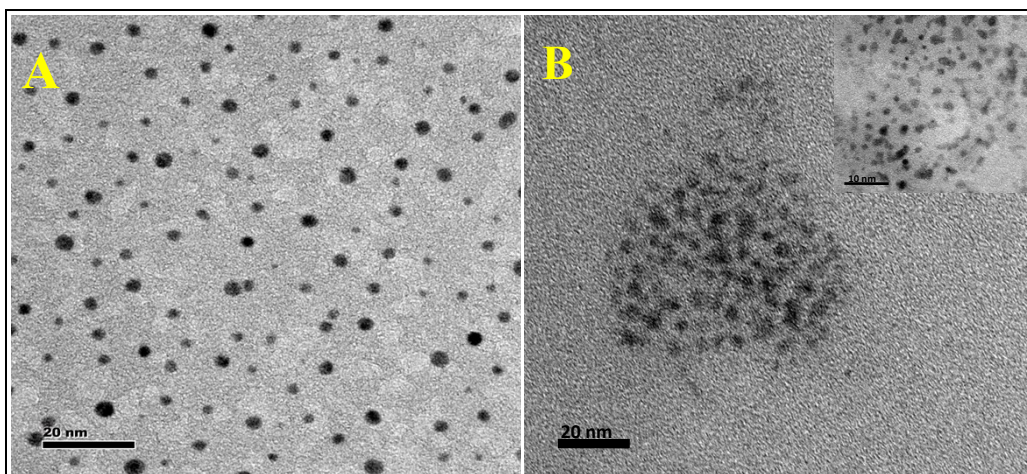

**Fig.S2.** HR-TEM images of colloidal BSA-AuNCs in the absence (A) and presence (B) of TBHQ.

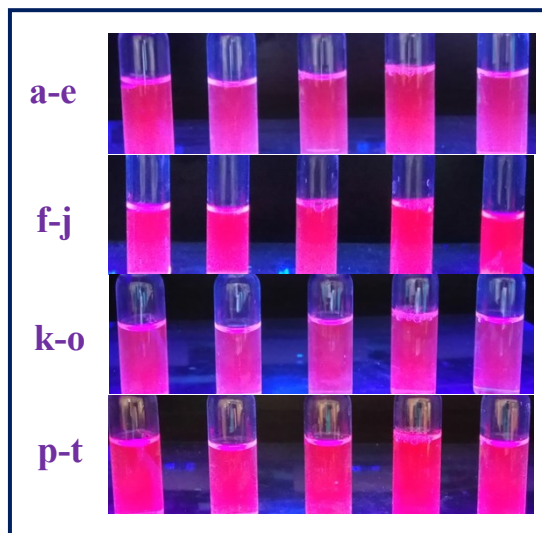

**Fig.S3.** Photographs of BSA-AuNCs in the presence of various interferences (a-e)  $\text{Na}^+$ ,  $\text{Ni}^{2+}$ ,  $\text{Zn}^{2+}$ ,  $\text{Mg}^{2+}$ ,  $\text{Fe}^{3+}$ , (f-j)  $\text{Mn}^{2+}$ ,  $\text{CO}_3^{2-}$ , Iso, Try, His, (k-o) Gly, Tyr, Lys, Vit-E, Vit-C, (p-t) Vit-B6, potassium sorbate, benzoic acid, cholestenone and oleic acid under UV light.

**Table S1.** Determination of TBHQ in edible and coconut oil samples.

| Sample      | Added ( $\mu\text{M}$ ) | Found ( $\mu\text{M}$ ) | Recovery (%) | RSD (%) |
|-------------|-------------------------|-------------------------|--------------|---------|
|             | -                       | 7.5                     | -            | -       |
| Edible oil  | 5                       | 12.3                    | 98.4         | 1.35    |
|             | 10                      | 22.5                    | 100.8        | 0.85    |
| Coconut oil | 5                       | 4.95                    | 99.0         | 0.96    |
|             | 10                      | 9.95                    | 99.5         | 0.75    |
|             | 15                      | 14.90                   | 99.3         | 0.60    |

**Table S2.** Validation of the present method of TBHQ determination with the standard GC-MS method.

| TBHQ spiked ( $\mu\text{g/L}$ ) | TBHQ measured ( $\mu\text{g/L}$ ) |                 | RSD % |
|---------------------------------|-----------------------------------|-----------------|-------|
|                                 | Present method                    | GC-MS method    |       |
| 11.0                            | $11.0 \pm 0.20$                   | $11.1 \pm 0.15$ | 0.86  |
| 12.0                            | $12.0 \pm 0.40$                   | $12.0 \pm 0.65$ | 0.73  |
| 13.0                            | $13.1 \pm 0.35$                   | $13.1 \pm 0.43$ | 0.95  |
| 14.0                            | $14.0 \pm 0.15$                   | $13.9 \pm 0.40$ | 0.68  |
